# Supplementary material for: High-Resolution Transect Sampling and Multiple Scale Diversity Analyses for Evaluating Grassland Resilience to Climatic Extremes
Source: MDPI journal article supplement (doi:10.3390/land11030378), 2022-03-04
Supplement: s1 [file s1]

Archive with 1 entries (1 files):
- land-1608736-supplementary.pdf
